# Supplementary material
Source: HighWire-hosted journal article supplement (https://ard.bmj.com/content/78/3/365)
Supplement: inline-supplementary-material-1 [file inline-supplementary-material-1.pdf]

## SUPPLEMENTARY MATERIAL

**Table S1.** Weighted-scores of the items in the SLE-DAS.

| <b>Manifestations included in the multivariate linear regression model</b>     | <b>Regression Coefficient</b>             | <b>Standard error</b> | <b>P-value</b>       |
|--------------------------------------------------------------------------------|-------------------------------------------|-----------------------|----------------------|
| <b>Constant</b>                                                                | 0.366                                     | 0.176                 | 0.038                |
| <b>1. Arthritis (yes/no)</b>                                                   | 3.132                                     | 0.630                 | <0.0005              |
| <b>Arthritis (28-swollen joint count)</b>                                      | 0.454                                     | 0.086                 | <0.0005              |
| <b>2. Mucocutaneous vasculitis (yes/no)</b>                                    | 4.408                                     | 0.495                 | <0.0005              |
| <b>3. Localized cutaneous rash (yes/no)</b>                                    | 3.138                                     | 0.354                 | <0.0005              |
| <b>4. Generalized cutaneous rash (yes/no)</b>                                  | 3.887                                     | 0.465                 | <0.0005              |
| <b>5. Alopecia (yes/no)</b>                                                    | 0.973                                     | 0.489                 | 0.048                |
| <b>6. Mucosal ulcers (yes/no)</b>                                              | 2.769                                     | 0.518                 | <0.0005              |
| <b>7. Hypocomplementemia (yes/no)</b>                                          | 0.754                                     | 0.172                 | <0.0005              |
| <b>8. Increased anti-dsDNA (yes/no)</b>                                        | 0.956                                     | 0.188                 | <0.0005              |
| <b>9. Proteinuria &gt;500mg/24h</b>                                            | -17.584+3.811x<br>ln(proteinuria mg/24h)  | 2.585 and<br>0.353    | <0.0005 <sup>‡</sup> |
| <b>10. Thrombocytopenia &lt;100x10<sup>9</sup>/L</b>                           | 26.105-5.577x<br>ln(platelet count)       | 1.365 and<br>0.349    | <0.0005 <sup>‡</sup> |
| <b>11. Leukopenia &lt;3x10<sup>9</sup>/L</b>                                   | 6.118-5.058x<br>ln(leukocyte count)       | 1.267 and<br>1.333    | <0.0005 <sup>‡</sup> |
| <b>Manifestations not included in the multivariate linear regression model</b> | <b>Discretionary weights/coefficients</b> |                       |                      |
| <b>12. Neuropsychiatric involvement* (yes/no)</b>                              | 18                                        | -                     | -                    |
| <b>13. Systemic vasculitis* (yes/no)</b>                                       | 18                                        | -                     | -                    |
| <b>14. Cardiac/Pulmonary involvement* (yes/no)</b>                             | 18                                        | -                     | -                    |
| <b>15. Myositis* (yes/no)</b>                                                  | 9                                         | -                     | -                    |
| <b>16. Serositis* (yes/no)</b>                                                 | 6                                         | -                     | -                    |
| <b>17. Hemolytic anemia* (yes/no)</b>                                          | 9                                         | -                     | -                    |

ln, natural logarithm; <sup>¥</sup> p-value obtained for both the logarithm and the dummy variable indicating a value below/above the referenced value; \*Manifestations with weight defined by the expert; R<sup>2</sup>=0.91 for the model.

**Table S2.** SLE - Disease Activity Score (SLE-DAS) data collection form.

Study No: \_\_\_\_\_ Patient Name: \_\_\_\_\_ Visit Date: \_\_\_\_/\_\_\_\_/\_\_\_\_  
d m yr

**(Score if the descriptor is present and attributed to active SLE at the time of the visit or in the preceding 30 days)**

| <b>Score</b>                          | <b>Descriptor</b>                      | <b>Definition</b>                                                                                                                                                                                                                                                                                           |
|---------------------------------------|----------------------------------------|-------------------------------------------------------------------------------------------------------------------------------------------------------------------------------------------------------------------------------------------------------------------------------------------------------------|
| Present / absent                      | <b>Neuropsychiatric involvement</b>    | Recent onset of seizure, psychosis, organic brain syndrome, visual disturbance related with SLE, cranial nerve disorder, lupus headache, cerebrovascular accident, aseptic meningitis or sensory or motor lupus neuropathy of the cranial or peripheral pairs. Exclude metabolic, infectious or drug causes |
| Present / absent                      | <b>Systemic vasculitis</b>             | Systemic vasculitis involving large and medium-sized vessels and lupus enteritis                                                                                                                                                                                                                            |
| Present / absent                      | <b>Mucocutaneous vasculitis</b>        | Any mucocutaneous vasculitis and chilblain lupus                                                                                                                                                                                                                                                            |
| Present / absent                      | <b>Cardiac / Pulmonary involvement</b> | Shrinking lung, interstitial pneumonitis, diffuse alveolar hemorrhage, pulmonary hypertension, myocarditis, valvular dysfunction, Libman-Sacks endocarditis                                                                                                                                                 |
| Present / absent                      | <b>Myositis</b>                        | Proximal muscle aching/weakness with elevated CPK/aldolase or electromyogram changes or a biopsy showing myositis                                                                                                                                                                                           |
| Present / absent                      | <b>Serositis</b>                       | Pleurisy, pericarditis or sterile peritonitis                                                                                                                                                                                                                                                               |
| Present / absent                      | <b>Hemolytic anemia</b>                | With positive direct Coombs test, increased serum LDH, and low serum haptoglobin                                                                                                                                                                                                                            |
| _____                                 | <b>Arthritis</b>                       | Number of swollen joints (in 28 joint count)                                                                                                                                                                                                                                                                |
| (number from 28 joint count)          |                                        |                                                                                                                                                                                                                                                                                                             |
| _____                                 | <b>Proteinuria</b>                     | Urinary Protein - Creatinine ratio >500mg/g or 24h urinary protein >500mg/24h                                                                                                                                                                                                                               |
| (mg/g or mg/24h)                      |                                        |                                                                                                                                                                                                                                                                                                             |
| Present / absent                      | <b>Localized rash</b>                  | Inflammatory type rash only above the neck                                                                                                                                                                                                                                                                  |
| Present / absent                      | <b>Generalized rash</b>                | Inflammatory type rash above and below the neck                                                                                                                                                                                                                                                             |
| Present / absent                      | <b>Alopecia</b>                        | Abnormal, patchy or diffuse loss of hair                                                                                                                                                                                                                                                                    |
| Present / absent                      | <b>Mucosal ulcers</b>                  | Oral or nasal ulcerations                                                                                                                                                                                                                                                                                   |
| Present / absent                      | <b>Low complement</b>                  | Decrease in C3 or C4 below the lower limit of normal for testing laboratory                                                                                                                                                                                                                                 |
| Present / absent                      | <b>Increased anti-dsDNA</b>            | Increase in DNA binding above the upper limit of normal for testing laboratory                                                                                                                                                                                                                              |
| _____                                 | <b>Thrombocytopenia</b>                | <100x10 <sup>9</sup> /L platelets, excludes drug causes                                                                                                                                                                                                                                                     |
| (platelet count – 10 <sup>9</sup> /L) |                                        |                                                                                                                                                                                                                                                                                                             |
| _____                                 | <b>Leukopenia</b>                      | <3x10 <sup>9</sup> /L white blood cells, exclude drug causes                                                                                                                                                                                                                                                |
| (leukocyte count –10 <sup>9</sup> /L) |                                        |                                                                                                                                                                                                                                                                                                             |

**TOTAL SCORE** \_\_\_\_\_
